## Supporting Information

**S2 Table: Weight Loss Effectiveness Overall, By Type of Program, and By Duration of Program Participation: Standard International Unit Metric System with 95% confidence interval**

|                                           | Overall        | Duration of Participation (months) |                |                | p Value |
|-------------------------------------------|----------------|------------------------------------|----------------|----------------|---------|
|                                           |                | ≤ 6                                | 7-12           | 13-24          |         |
| <b>Overall</b>                            |                |                                    |                |                |         |
| N, %                                      | 500            | 165 (33.0)                         | 140 (28.0)     | 195 (39.0)     |         |
| Baseline Weight Kg, Mean(SD)              | 110.5 (28.2)   | 105.2 (25.7)                       | 113.4 (31.6)   | 112.7 (27.1)   | 0.01    |
| (95% CI)                                  | (108.0, 112.9) | (101.3, 109.2)                     | (108.2, 118.7) | (108.9, 116.6) |         |
| Baseline BMI, kg/m <sup>2</sup> Mean (SD) | 38.8 (8.4)     | 37.7 (8.2)                         | 39.0 (9.2)     | 39.6 (7.8)     | 0.02    |
| (95% CI)                                  | (38.1, 39.5)   | (36.5, 39.0)                       | (37.5, 40.5)   | (38.5, 40.7)   |         |
| Change Weight Kg, Mean (SD)               | -21.6 (14.2)   | -17.5 (8.6)                        | -22.5 (13.2)   | -24.5 (17.5)   | 0.00    |
| (95% CI)                                  | (-22.9, -20.4) | (-18.8, -16.1)                     | (-24.7, -20.3) | (-27.0, -22.1) |         |
| Change in BMI, Mean (SD)                  | -7.7 (5.1)     | -6.4 (3.6)                         | -7.8 (4.4)     | -8.6 (6.2)     | 0.00    |
| (95% CI)                                  | (-8.1, -7.2)   | (-7.0, -5.8)                       | (-8.5, -7.1)   | (-9.5, -7.7)   |         |
| % Change Weight, Mean (SD)                | -18.9 (9.5)    | -16.4 (6.2)                        | -19.3 (8.5)    | -20.7 (11.7)   | 0.00    |
| (95% CI)                                  | (-19.7, -18.1) | (-17.4, -15.5)                     | (-20.7, -17.9) | (-22.4, -19.1) |         |
| % Change BMI, Mean (SD)                   | -19.1 (10.4)   | -16.7 (7.2)                        | -19.5 (9.0)    | -20.8 (13.0)   | 0.00    |
| (95%)                                     | (-20.0, -18.2) | (-17.8, -15.6)                     | (-21.0, -18.0) | (-22.6, -19.0) |         |
| <b>Decision Free</b>                      |                |                                    |                |                |         |
| N, %                                      | 351            | 103 (29.3)                         | 102 (29.1)     | 146 (41.6)     |         |
| Baseline Weight Kg, Mean(SD)              | 112.9 (27.9)   | 109.3 (27.0)                       | 114.2 (32.7)   | 114.7 (24.8)   | 0.12    |
| (95% CI)                                  | (110.0, 115.9) | (104.0, 114.6)                     | (107.8, 120.6) | (110.6, 118.7) |         |
| Baseline BMI, Mean (SD)                   | 39.7 (8.5)     | 39.1 (8.6)                         | 39.3 (9.8)     | 40.3 (7.3)     | 0.07    |
| (95% CI)                                  | (38.8, 40.5)   | (37.4, 40.8)                       | (37.4, 41.2)   | (39.1, 41.5)   |         |
| Change Weight Kg, Mean (SD)               | -23.1 (14.9)   | -18.9 (9.4)                        | -23.9 (13.9)   | -25.6 (18.0)   | 0.00    |
| (95% CI)                                  | (-24.7, -21.6) | (-20.8, -17.1)                     | (-26.6, -21.1) | (-28.5, -22.6) |         |

|                              |                |                |                |                |      |
|------------------------------|----------------|----------------|----------------|----------------|------|
| Change in BMI, Mean (SD)     | -8.3 (5.4)     | -7.0 (4.1)     | -8.3 (4.6)     | -9.1 (6.4)     | 0.01 |
| (95% CI)                     | (-8.8, -7.7)   | (-7.8, -6.2)   | (-9.2, -7.4)   | (-10.2, -8.1)  |      |
| % Change Weight, Mean (SD)   | -19.8 (9.9)    | -17.2 (6.7)    | -20.3 (8.5)    | -21.3 (12.1)   | 0.00 |
| (95% CI)                     | (-20.8, -18.8) | (-18.5, -15.9) | (-22.0, -18.6) | (-23.3, -19.3) |      |
| % Change in BMI, Mean (SD)   | -20.2 (10.9)   | -17.6 (7.9)    | -20.5 (9.1)    | -21.8 (13.2)   | 0.00 |
| (95% CI)                     | (-21.3, -19.1) | (-19.1, -16.0) | (-22.3, -18.7) | (-24.0, -19.7) |      |
| <b>Healthy Solutions</b>     |                |                |                |                |      |
| N, %                         | 149            | 62 (41.6)      | 38 (25.5)      | 49 (32.9)      |      |
| Baseline Weight Kg, Mean(SD) | 104.6 (28.0)   | 98.5 (21.9)    | 111.5 (28.7)   | 107.0 (32.8)   | 0.06 |
| (95% CI)                     | (100.1, 109.1) | (92.9, 104.1)  | (102.0, 120.9) | (97.5, 116.4)  |      |
| Baseline BMI, Mean (SD)      | 36.8 (7.7)     | 35.5 (6.8)     | 38.1 (7.4)     | 37.4 (8.9)     | 0.23 |
| (95% CI)                     | (35.5, 38.0)   | (33.7, 37.2)   | (35.7, 40.6)   | (34.9, 40.0)   |      |
| Change Weight Kg, Mean (SD)  | -18.1 (11.5)   | -15.0 (6.5)    | -18.9 (10.6)   | -21.4 (15.6)   | 0.07 |
| (95% CI)                     | (-20.0, -16.3) | (-16.7, -13.4) | (-22.4, -15.4) | (-25.9, -17.0) |      |
| Change BMI, Mean (SD)        | -6.2 (3.9)     | -5.4 (2.3)     | -6.5 (3.5)     | -7.1 (5.3)     | 0.18 |
| (95% CI)                     | (-6.9, -5.6)   | (-6.0, -4.8)   | (-7.7, -5.4)   | (-8.6, -5.5)   |      |
| % Change Weight, Mean (SD)   | -16.8 (8.0)    | -15.2 (5.2)    | -16.6 (8.1)    | -19.0 (10.2)   | 0.13 |
| (95% CI)                     | (-18.1, -15.5) | (-16.5, -13.8) | (-19.3, -14.0) | (-21.9, -16.1) |      |
| % Change in BMI, Mean (SD)   | -16.4 (8.7)    | -15.2 (5.5)    | -16.8 (8.2)    | -17.7 (11.8)   | 0.31 |
| (95% CI)                     | (-17.8, -15.0) | (-16.6, -13.8) | (-19.5, -14.1) | (-21.1, -14.4) |      |
