## Supporting Information

**S5 Table: Weight Loss Efficacy (mean, sd) by Status of Medication Use: Standard International Unit Metric System with 95% confidence interval**

|                                | No Medication at baseline      |                                | Medication at baseline         |                                |         |
|--------------------------------|--------------------------------|--------------------------------|--------------------------------|--------------------------------|---------|
|                                | No medication at follow-up     | Medication at follow-up        | No medication at follow-up     | Medication at follow-up        | p-value |
| <b>Cholesterol medication</b>  |                                |                                |                                |                                |         |
| N (%)                          | 295 (59.0)                     | 13 (2.6)                       | 43 (8.6)                       | 149 (29.8)                     |         |
| Baseline Weight kg<br>(95% CI) | 107.8 (26.3)<br>(104.8, 110.8) | 123.0 (34.3)<br>(102.3, 143.8) | 114.2 (25.6)<br>(106.3, 122.0) | 113.5 (31.3)<br>(108.4, 118.6) | 0.08    |
| Change Weight kg<br>(95% CI)   | -21.0 (12.9)<br>(-22.5, -19.5) | -25.3 (15.5)<br>(-34.6, -15.9) | -29.4 (17.5)<br>(-34.8, -24.0) | -20.3 (14.7)<br>(-22.7, -17.9) | 0.00    |
| % Change Weight<br>(95% CI)    | -18.9 (9.1)<br>(-19.9, -17.9)  | -19.7 (10.6)<br>(-26.1, -13.3) | -24.7 (10.7)<br>(-28.0, -21.5) | -17.2 (9.2)<br>(-18.7, -15.7)  | 0.00    |
| <b>Anti-hypertensive</b>       |                                |                                |                                |                                |         |
| N (%)                          | 253 (50.6)                     | 12 (2.40)                      | 79 (15.8)                      | 156 (31.2)                     |         |
| Baseline Weight kg<br>(95% CI) | 103.7 (23.0)<br>(100.8, 106.5) | 116.6 (27.4)<br>(99.3, 134.0)  | 112.9 (23.2)<br>(107.7, 118.1) | 119.7 (34.6)<br>(114.3, 125.2) | 0.00    |
| Change Weight kg<br>(95% CI)   | -20.0 (12.3)<br>(-21.5, -18.4) | -24.1 (13.7)<br>(-32.8, -15.4) | -26.3 (16.3)<br>(-29.9, -22.6) | -21.8 (15.4)<br>(-24.3, -19.4) | 0.00    |
| % Change Weight<br>(95% CI)    | -18.7 (9.2)<br>(-19.8, -17.5)  | -20.1 (8.5)<br>(-25.5, -14.7)  | -22.4 (10.7)<br>(-24.8, -20.0) | -17.4 (8.8)<br>(-18.8, -16.0)  | 0.00    |
| <b>Oral Anti-diabetics</b>     |                                |                                |                                |                                |         |
| N, %                           | 391 (85.4)                     | -                              | 27 (5.90)                      | 40 (8.73)                      |         |
| Baseline Weight kg<br>(95% CI) | 107.2 (25.5)<br>(104.7, 109.8) | -                              | 123.5 (26.1)<br>(113.2, 133.8) | 114.8 (37.9)<br>(102.6, 126.9) | 0.00    |
| Change Weight kg               | -20.8 (12.5)                   | -                              | -28.6 (18.6)                   | -21.0 (13.8)                   | 0.08    |

|                 |                |   |                |                |      |
|-----------------|----------------|---|----------------|----------------|------|
| (95% CI)        | (-22.0, -19.5) |   | (-36.0, -21.2) | (-25.4, -16.6) |      |
| % Change Weight | -18.8 (9.0)    | - | -22.2 (12.5)   | -17.5 (6.7)    | 0.35 |
| (95% CI)        | (-19.7, -17.9) |   | (-27.1, -17.2) | (-19.6, -15.3) |      |
